# Supplementary material for: CHIMs are versatile cholesterol analogs mimicking and visualizing cholesterol behavior in lipid bilayers and cells
Source: PubMed Central journal article supplement (PMC8196198; doi:10.1038/s42003-021-02252-5), 2021-06-11
Supplement: 42003_2021_2252_MOESM2_ESM.pdf [file 42003_2021_2252_MOESM2_ESM.pdf]

## **Description of Additional Supplementary Files**

**File name:** Supplementary Data 1

**Description:** Underlying data for charts and tables.
